# Supplementary material
Source: PubMed Central journal article supplement (PMC3918164)
Supplement: NIHMS551720-supplement-Fig__3.pdf [file NIHMS551720-supplement-Fig__3.pdf]

**A**

|                         |                                                                   |
|-------------------------|-------------------------------------------------------------------|
|                         | -5736            -5731                                            |
| <i>FoxE3</i> -Su(H)     | GAAATCCCA <sup>A</sup> CACAT                                      |
| <i>FoxE3</i> -Su(H) mt  | GAAATCTAGA <sup>A</sup> ACAT                                      |
| <i>E(spl)</i> <i>m8</i> | CCGTTCCCA <sup>A</sup> CAGTG                                      |
| Su(H) consensus         | TTC <sup>T</sup> CA <sup>T</sup><br>C <sup>C</sup> C <sup>C</sup> |

**B**

|                      |                            |
|----------------------|----------------------------|
|                      | -5858            -5853     |
| <i>FoxE3</i> -Otx    | AAAGGATTAG <sup>A</sup> GC |
| <i>FoxE3</i> -Otx mt | AAACCGGTAGGC               |
| <i>rGnRH</i> -Otx    | AAGGGATTAAAA               |
| Otx consensus        | G <sup>A</sup> GATTA       |

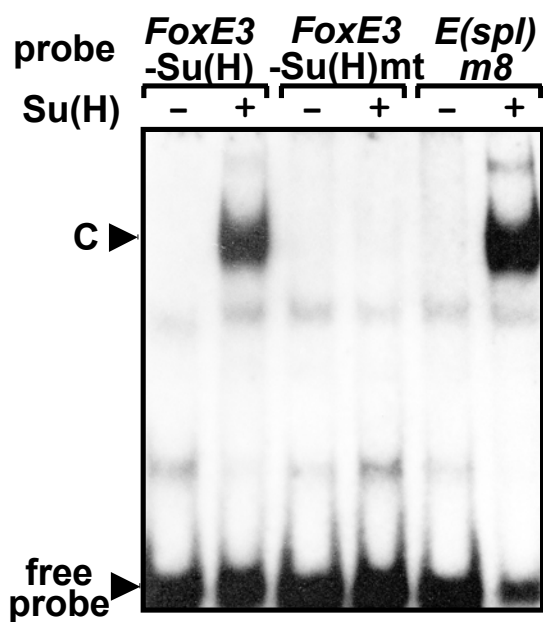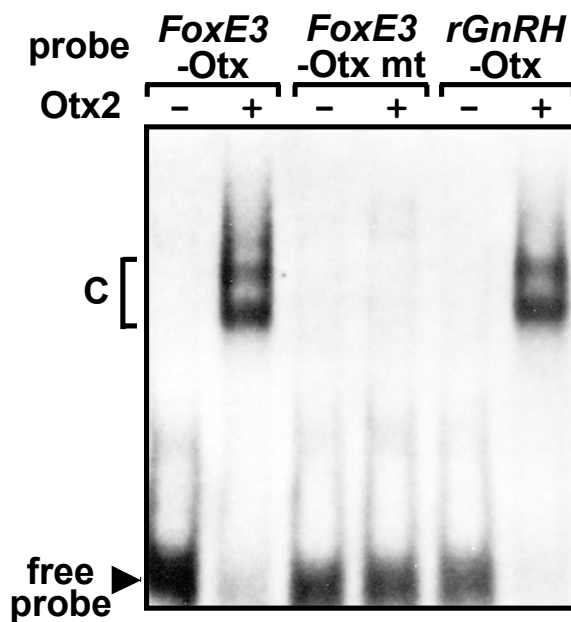

Fig. S3
